# Supplementary material for: Mixed matrix membranes incorporated with size-reduced Cu-BTC for improved gas separation
Source: Royal Society of Chemistry journal article supplement (doi:10.1039/c3ta11131h), 2013-01-01
Supplement: c3ta11131h.pdf [file c3ta11131h.pdf]

## Supplementary Information

### Mixed matrix membranes incorporated with size-reduced Cu-BTC for improving gas separation

Lei Ge; Wei Zhou; Victor Rudolph; Zhonghua Zhu\*

The University of Queensland, School of Chemical Engineering, St Lucia, Brisbane 4072 Australia

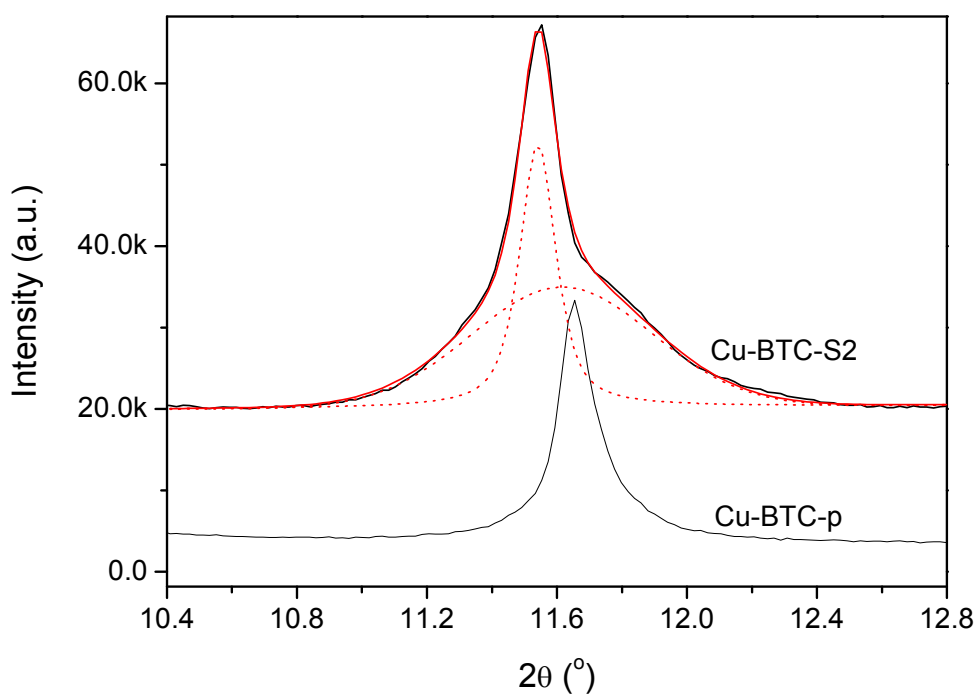

**Fig.S1** XRD (222) peaks of Cu-BTC-p and Cu-BTC-S2, and curve fitting of (222) peak of Cu-BTC-S2 in red color

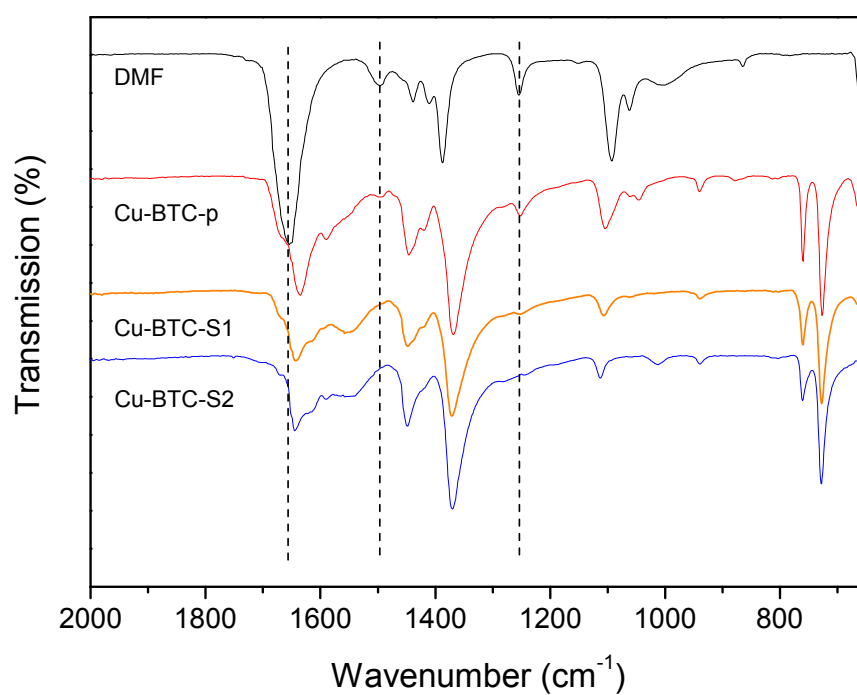

**Fig. S2** FTIR-ATR spectra of DMF solvent, as-synthesized and sonication-treated Cu-BTC crystals

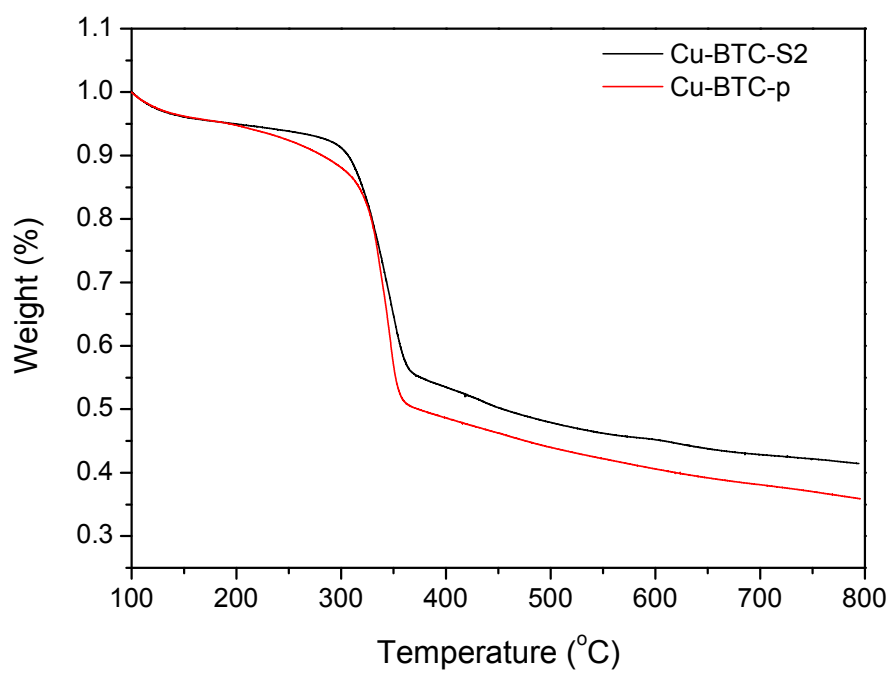

**Fig.S3** TGA curves of Cu-BTC-p and Cu-BTC-S2

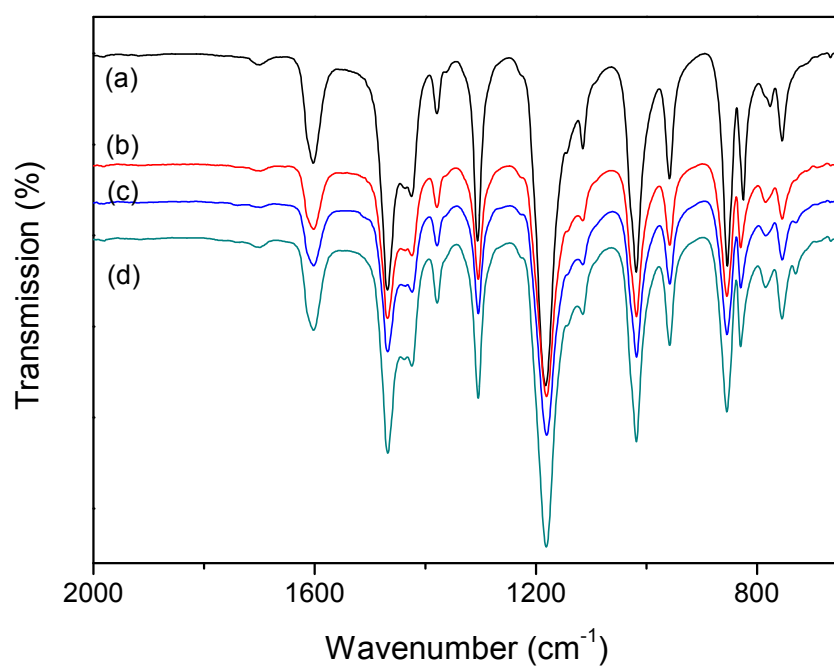

**Fig.S4** FTIR-ATR spectra of pure PPO membrane (a) and Cu-BTC/PPO MMMs (b: 10% Cu-BTC-p, c: 10% Cu-BTC-S1, d: 10% Cu-BTC-S2)

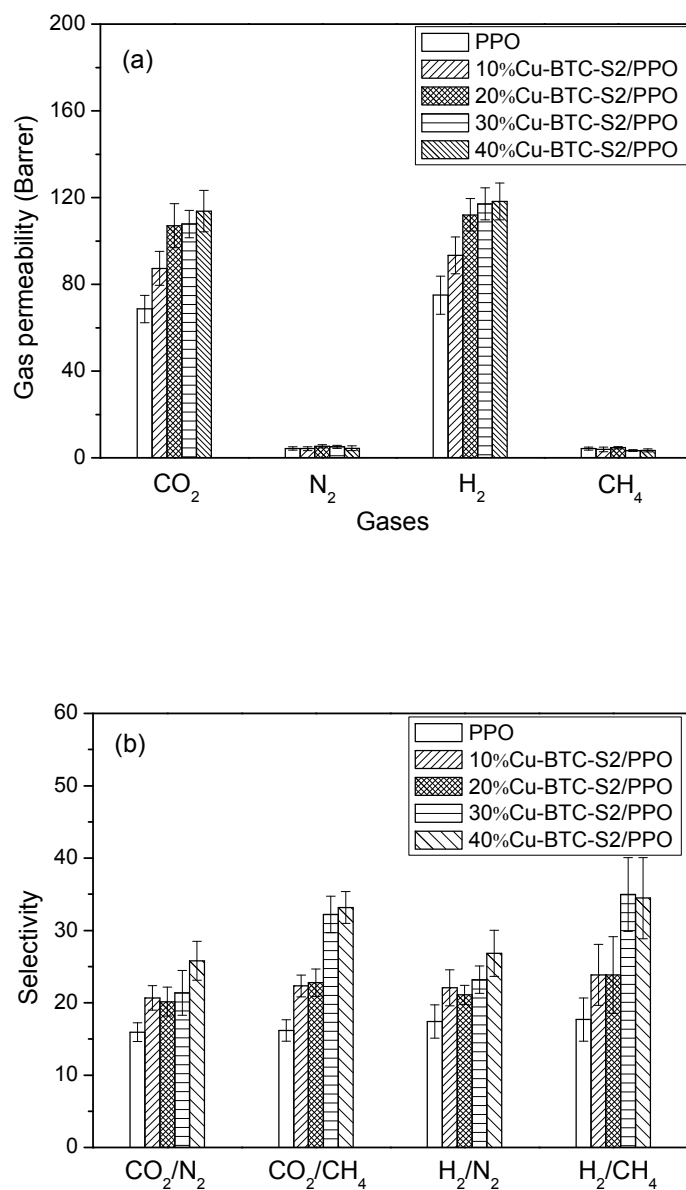

**Fig.S5** Gas permeance and selectivity of pure PPO membrane and MMMs with various Cu-BTC-S2 loading amounts

Table S1 Structure parameters of Cu-BTC-p, Cu-BTC-S1 and Cu-BTC-S2 based on Le Bail refinements

| Samples   | Space Group | Lattice Parameters (Å) | <i>R</i> factors (%)    |                        |                       |          |
|-----------|-------------|------------------------|-------------------------|------------------------|-----------------------|----------|
|           |             |                        | <i>R</i> <sub>exp</sub> | <i>R</i> <sub>wp</sub> | <i>R</i> <sub>p</sub> | $\chi^2$ |
| Cu-BTC-p  | Fm-3m       | 26.2980(20)            | 2.25                    | 4.16                   | 3.09                  | 1.85     |
| Cu-BTC-S1 | Fm-3m       | 26.3232(13)            | 1.92                    | 3.69                   | 2.83                  | 1.92     |
| Cu-BTC-S2 | Fm-3m       | 26.4167(87)            | 1.21                    | 8.77                   | 5.26                  | 7.28     |

Table S2 IR frequency assigned to the Cu-BTC/PPO bands

| Frequency, cm <sup>-1</sup> | Vibration                                                  |
|-----------------------------|------------------------------------------------------------|
| 855                         | Aromatic C-H bending                                       |
| 960                         | C-O-C bending                                              |
| 1020                        | Trigonal ring breathing                                    |
| 1120                        | C-O-C anti-stretching                                      |
| 1180                        | Plane C-H bending                                          |
| 1300                        | C-O-C, C-C bridge bond                                     |
| 1380                        | CH <sub>3</sub> symmetric bending                          |
| 1420-1450                   | C-C aromatic stretching                                    |
| 1469                        | CH <sub>2</sub> bending, CH <sub>3</sub> anti-bending      |
| 1600                        | C-C aromatic ring                                          |
| 1645                        | Anti-symmetric stretch vibrations of the carboxylate group |
| 1112                        | C-H in plane bending mode of the aromatic ring             |
